# Supplementary material for: Genetic variation for tolerance to pre-harvest sprouting in mungbean (Vigna radiata) genotypes
Source: PeerJ. 2024 Jul 23;12:e17609. doi: 10.7717/peerj.17609 (PMC11276771; doi:10.7717/peerj.17609)
Supplement: Supplemental Information 1 [file peerj-12-17609-s001.xls]

## Sheet: PHS
Genotype	R1	R2	R3
BASANTI	52.4807	60.7067	79.112
China Mung	48.1193	52.546	55.5847
COGG 912	46.4	78.036	69.042
DMS 8	79.3533	73.7227	82.3527
GANGA 1	52.7427	40.9933	48.1493
HUM 2	37.7507	44.8187	33.0793
IC 28083	66.1467	67.3513	63.0633
IC 436637	37.7087	49.796	51.378
IC 436763	65.41	60.7273	70.3693
IC 546476	64.3307	64.1007	46.44
IC 546488	71.2093	46.4487	68.048
IPM 02-14	39.6787	60.6187	60.052
IPM 02-15	42.0167	48.152	45.548
IPM 02-30	51.3873	45.3573	51.418
IPM 409-4	55.332	64.1067	75.3307
IPM 410-3	54.2033	34.266	66.6813
KM 16-58	62.67	55.434	49.11
KM 16-69	46.6147	44.922	48.854
KM 16-76	24.06	24.3833	27.5027
KM 16-81	69.1887	51.2973	63.9167
KM 16-82	35.6153	18.918	21.544
KM 2241	80.4747	73.014	75.9673
KM 7-134	86.4853	70.2333	82.536
LGG 460	71.574	63.434	80.8353
M 1032	79.0927	79.448	56.816
M 1053	56.0073	74.6413	73.372
M 1131	89.408	77.72	50.66
M 1156	58.7407	76.1813	54.374
M 1168	65.8707	56.8073	67.7613
M 1255	16.31	20.5467	16.8027
M 1358	76.672	68.5793	87.9173
M 1370	77.3673	73.28	54.9347
M 1372	54.0847	51.5027	46.5413
M 1378	69.9293	65.4367	92.2313
M 1400	53.7267	31.1067	54.7933
M 1421	20.3267	32.0307	22.4513
M 1447	81.1307	76.8433	58.0113
M 145	35.8233	14.6233	12.964
M 1477	58.2547	52.756	91.244
M 1485	32.0367	62.9907	43.32
M 204	31.0547	26.308	23.9607
M 313	59.3247	33.2753	35.1827
M 422	18.078	32.896	23.082
M 684	61.3073	58.4353	44.034
M 700	68.0133	62.5133	59.1333
M 703	60.5333	68.4487	72.026
M 837	55.6747	64.846	74.4433
M 958	29.5287	32.52	51.1407
M 981	32.59	18.0087	38.432
MH 1442	44.154	54.316	31.434
MH 215	40.4487	25.8247	31.428
MH 318	74.7747	19.444	52.5033
MH 565	50.604	49.262	49.3887
MH 810	79.1133	69.4907	40.2513
MH 934	54.9147	43.9947	47.724
MH 96-1	26.8213	53.25	66.432
ML 1299	39.3433	53.932	22.1847
ML 1451	40.0827	29.6867	27.54
ML 1464	55.992	56.9687	53.2953
ML 1628	86.6067	77.192	49.46
ML 2037	63.3047	45.9073	74.2447
ML 818	31.6333	19.424	31.366
MUSKAN	88.17	62.774	62.3953
OLRM 4	47.246	36.4533	30.5373
PDM 139	53.8773	59.6013	76.0073
PLM 167	86.3553	73.148	83.4533
PLM 271	63.026	60.6313	44.886
PS 16	52.612	50.2867	45.0727
PUSA 0971	93.7347	68.698	79.258
PUSA 1131	91.9573	75.9153	67.0033
PUSA 1132	56.6187	47.8153	58.9047
PUSA 1332	33.2173	19.0053	30.1293
PUSA 1333	45.6953	52.76	72.4813
PUSA 1341	72.0233	61.7673	57.7413
PUSA 1342	63.5927	52.54	54.1687
PUSA 1441	77.1147	57.6927	59.83
Pusa Baisakhi	42.002	53.98	35.8687
RMG 1028	45.8647	50.364	40.2667
RMG 991	50.472	67.5987	58.7327
RMGP 1	48.134	31.1333	61.4253
SATYA	72.8933	83.8613	72.74
SML 668	19.114	39.2667	56.9473
TM 9725	64.9133	76.7773	60.5173

## Sheet: WICP
		15 Pods dry weight (g)			15 Pods imbibed weight (g)			WICP
Genotype	R1	R2	R3	R1	R2	R3		R1	R2	R3
BASANTI	5.543	5.794	5.254	8.791	9.535	8.137		58.5964	64.5668	54.8725
China Mung	5.854	5.379	6.367	9.061	8.255	9.44		54.7831	53.4672	48.2645
COGG 912	4.999	5.317	4.648	7.58	7.83	6.93		51.6303	47.2635	49.0964
DMS 8	6.51	5.989	6.711	9.62	9.252	10.12		47.7727	54.4832	50.7972
GANGA 1	4.717	5.25	5.565	7.271	7.905	8.07		54.1446	50.5714	45.0135
HUM 2	6.163	6.818	7.472	9.241	10.215	10.33		49.9432	49.824	38.2495
IC 28083	5.264	5.096	4.861	8.3	8.099	7.55		57.6748	58.9286	55.3178
IC 436637	6.769	7.507	8.353	9.278	10.73	11.651		37.066	42.9333	39.4828
IC 436763	6.152	6.579	7.353	8.89	9.51	10.758		44.5059	44.5508	46.3076
IC 546476	5.515	5.302	5.156	7.867	7.785	7.561		42.6473	46.8314	46.6447
IC 546488	4.03	4.008	4.17	7	6.544	7.055		73.6973	63.2735	69.1847
IPM 02-14	4.635	5.386	4.655	6.89	8.107	7.21		48.6516	50.5199	54.8872
IPM 02-15	4.332	4.525	4.503	6.347	6.8	6.65		46.5143	50.2762	47.6793
IPM 02-30	7.018	7.03	6.828	10.62	10.52	10.47		51.3252	49.6444	53.3392
IPM 409-4	6.374	5.828	5.792	9.58	8.85	8.702		50.2981	51.8531	50.2417
IPM 410-3	5.154	5.705	5.46	7.945	8.407	8.28		54.1521	47.362	51.6484
KM 16-58	5.045	5.211	5.209	7.9	8.03	8.112		56.5907	54.0971	55.7305
KM 16-69	5.382	5.054	5.598	8.034	7.23	7.93		49.2754	43.055	41.6577
KM 16-76	3.625	4.175	3.812	6.176	6.827	6.116		70.3724	63.521	60.4407
KM 16-81	5.353	5.187	5.566	8.267	8.131	8.58		54.4368	56.7573	54.1502
KM 16-82	6.07	6.22	6.34	8.731	8.647	8.875		43.8386	39.0193	39.9842
KM 2241	5.46	5.465	5.309	7.719	7.882	7.888		41.3736	44.2269	48.5779
KM 7-134	7.498	7.398	7.088	10.877	10.681	10.47		45.0654	44.3769	47.7144
LGG 460	4.915	5.186	4.608	7.17	7.546	6.724		45.88	45.5071	45.9201
M 1032	5.817	5.9	6.306	8.226	8.435	8.442		41.4131	42.9661	33.8725
M 1053	7.34	7.86	6.922	10.126	10.97	9.737		37.9564	39.5674	40.6674
M 1131	6.975	6.193	5.464	10.37	9.35	9.266		48.6738	50.9769	69.5827
M 1156	7.548	6.6	6.155	10.538	9.14	9.108		39.6131	38.4848	47.9773
M 1168	5.318	5.615	5.44	7.794	8.338	7.781		46.5589	48.4951	43.0331
M 1255	8.238	7.887	8.917	11.28	10.846	11.96		36.9264	37.5174	34.1258
M 1358	6.058	5.942	5.972	9.101	8.438	8.666		50.2311	42.0061	45.1105
M 1370	5.143	5.362	5.059	7.661	7.521	7.188		48.9598	40.2648	42.0834
M 1372	6.834	7.656	6.824	9.892	11.023	9.928		44.7469	43.9786	45.4865
M 1378	6.83	7.063	6.123	9.791	10.162	9.368		43.3529	43.8765	52.9969
M 1400	5.252	5.76	4.951	7.932	8.889	7.581		51.0282	54.3229	53.1206
M 1421	5.257	5.179	4.168	7.754	7.476	5.824		47.4986	44.3522	39.7313
M 1447	6.188	6.33	7.586	9.265	9.231	11.349		49.7253	45.8294	49.6045
M 145	6.965	6.018	6.913	9.23	7.783	9.368		32.5197	29.3287	35.5128
M 1477	6.76	6.449	7.068	9.564	9.239	9.923		41.4793	43.2625	40.3933
M 1485	4.736	5.014	5.257	7.296	7.447	7.323		54.0541	48.5241	39.3
M 204	6.868	6.692	5.811	9.325	9.06	8.172		35.7746	35.3855	40.6298
M 313	5.606	5.225	4.873	8.079	7.538	7.175		44.1134	44.2679	47.2399
M 422	4.468	5.425	5.117	7.559	8.679	8.34		69.1808	59.9816	62.9861
M 684	6.476	5.93	5.967	9.052	8.659	8.656		39.7776	46.0202	45.0645
M 700	7.369	8.784	7.909	10.428	12.072	10.753		41.5117	37.4317	35.959
M 703	6.81	7.05	8.168	10	10.455	11.245		46.8429	48.2979	37.6714
M 837	5.077	5.193	5.337	7.628	8.104	8.136		50.2462	56.0562	52.4452
M 958	6.06	6.187	6.017	8.1366	8.653	8.424		34.2673	39.8578	40.0033
M 981	5.314	5.773	5.804	7.783	8.331	8.72		46.4622	44.3097	50.2412
MH 1442	6.03	6.378	5.805	8.61	9.236	8.342		42.7861	44.8103	43.7037
MH 215	6.388	8.08	8.195	9.26	11.68	11.392		44.9593	44.5545	39.0116
MH 318	6.167	7.585	6.078	9.043	11.487	9.031		46.6353	51.4436	48.5851
MH 565	7.058	6.737	6.775	9.921	9.563	9.307		40.5639	41.9475	37.3727
MH 810	6.372	7.15	7.347	9.384	10.4903	10.442		47.2693	46.7175	42.126
MH 934	6.74	6.366	6.737	9.658	9.125	9.968		43.2938	43.3396	47.959
MH 96-1	6.639	7.196	6.868	9.054	10.032	9.543		36.376	39.4108	38.9487
ML 1299	5.942	5.977	5.8	8.6505	8.767	8.19		45.5823	46.6789	41.2069
ML 1451	6.268	6.54	5.4	8.698	9.244	7.671		38.7683	41.3456	42.0556
ML 1464	6.81	6.779	6.566	9.688	9.561	9.315		42.2614	41.0385	41.8672
ML 1628	6.912	6.188	6.551	10.675	9.465	10.25		54.4416	52.9573	56.4647
ML 2037	7.025	6.95	7.661	10.146	10.385	11.086		44.427	49.4245	44.707
ML 818	6.789	6.033	6.428	9.552	8.658	9.75		40.6982	43.5107	51.6801
MUSKAN	6.348	6.69	5.995	9.203	10.403	9.093		44.9748	55.5007	51.6764
OLRM 4	7.03	7.271	6.88	9.841	10.658	9.94		39.9858	46.5823	44.4767
PDM 139	6.27	5.509	4.909	9.429	8.351	7.291		50.3828	51.5883	48.5231
PLM 167	6.361	6.091	6.015	9.358	8.899	8.82		47.1152	46.1008	46.6334
PLM 271	6.408	7.335	7.906	9.391	10.586	11.878		46.5512	44.3217	50.2403
PS 16	6.25	7.076	6.139	9.22	10.566	9.555		47.52	49.3217	55.6442
PUSA 0971	6.855	5.235	6.068	10.056	7.84	9.075		46.6958	49.7612	49.555
PUSA 1131	5.9	6.048	5.395	8.664	8.922	8.235		46.8475	47.5198	52.6413
PUSA 1132	6.909	6.21	7.065	10.24	9.045	10.25		48.2125	45.6522	45.0814
PUSA 1332	5.933	6.144	6.66	8.441	8.794	9.441		42.272	43.1315	41.7568
PUSA 1333	6.648	6.71	6.3	9.137	9.423	8.6		37.4398	40.4322	36.5079
PUSA 1341	5.015	4.817	4.265	7.666	7.362	6.643		52.8614	52.8337	55.7562
PUSA 1342	6.167	7.452	7.441	9.102	10.434	10.616		47.592	40.0161	42.669
PUSA 1441	7.134	8.362	6.633	10.3	11.817	9.618		44.379	41.3179	45.0023
Pusa Baisakhi	8.089	8.091	8.455	11.702	11.19	11.837		44.6656	38.3018	40
RMG 1028	7.63	6.96	6.878	10.626	9.804	9.918		39.2661	40.8621	44.1989
RMG 991	6.033	6.85	5.268	8.923	10.103	7.79		47.9032	47.4891	47.874
RMGP 1	7.933	7.923	6.83	11.872	12.33	10.607		49.6533	55.6229	55.3001
SATYA	5.632	5.33	5.335	8.608	8.468	7.856		52.8409	58.8743	47.254
SML 668	5.37	5.452	5.34	7.976	7.702	7.834		48.5289	41.2693	46.7041
TM 9725	6.033	5.646	5.8	8.769	8.252	8.238		45.3506	46.1566	42.0345

## Sheet: Ger pod
Genotype	R1	R2	R3
BASANTI	60	66.66	93.33
China Mung	60	80	80
COGG 912	80	86.66	93.33
DMS 8	93.33	93.33	93.33
GANGA 1	73.33	80	80
HUM 2	53.33	73.33	60
IC 28083	80	86.66	80
IC 436637	53.33	73.33	66.66
IC 436763	73.33	80	80
IC 546476	86.66	80	80
IC 546488	80	66.66	100
IPM 02-14	86.66	86.66	100
IPM 02-15	73.33	73.33	86.66
IPM 02-30	73.33	80	86.66
IPM 409-4	73.33	80	100
IPM 410-3	80	53.33	93.33
KM 16-58	80	66.66	60
KM 16-69	80	86.66	86.66
KM 16-76	40	40	53.33
KM 16-81	86.66	73.33	80
KM 16-82	80	73.33	80
KM 2241	100	93.33	86.66
KM 7-134	93.33	86.66	93.33
LGG 460	93.33	80	100
M 1032	93.33	86.66	93.33
M 1053	80	80	100
M 1131	100	100	60
M 1156	86.66	93.33	73.33
M 1168	80	86.66	93.33
M 1255	26.66	26.66	40
M 1358	86.66	86.66	93.33
M 1370	93.33	100	93.33
M 1372	66.66	66.66	66.66
M 1378	93.33	86.66	100
M 1400	66.66	66.66	66.66
M 1421	46.66	60	53.33
M 1447	100	93.33	80
M 145	86.66	46.66	53.33
M 1477	93.33	80	100
M 1485	53.33	93.33	80
M 204	80	80	80
M 313	93.33	73.33	73.33
M 422	33.33	46.66	60
M 684	100	100	86.66
M 700	86.66	93.33	86.66
M 703	80	93.33	100
M 837	93.33	80	86.66
M 958	60	80	86.66
M 981	93.33	53.33	80
MH 1442	86.66	86.66	73.33
MH 215	80	66.66	73.33
MH 318	80	20	66.66
MH 565	93.33	86.66	86.66
MH 810	100	80	80
MH 934	86.66	80	80
MH 96-1	53.33	73.33	80
ML 1299	66.66	93.33	60
ML 1451	86.66	60	46.66
ML 1464	73.33	73.33	80
ML 1628	100	93.33	66.66
ML 2037	93.33	66.66	100
ML 818	73.33	46.66	60
MUSKAN	100	73.33	80
OLRM 4	73.33	60	46.66
PDM 139	60	80	100
PLM 167	100	86.66	93.33
PLM 271	80	80	53.33
PS 16	86.66	66.66	73.33
PUSA 0971	93.33	73.33	86.66
PUSA 1131	100	93.33	86.66
PUSA 1132	86.66	73.33	93.33
PUSA 1332	46.66	53.33	66.66
PUSA 1333	73.33	73.33	100
PUSA 1341	86.66	80	73.33
PUSA 1342	86.66	86.66	86.66
PUSA 1441	86.66	73.33	80
Pusa Baisakhi	66.66	86.66	60
RMG 1028	66.66	80	73.33
RMG 991	80	86.66	86.66
RMGP 1	80	60	93.33
SATYA	80	86.66	86.66
SML 668	46.66	66.66	93.33
TM 9725	86.66	93.33	80

## Sheet: Pod length
Genotype	R1	R2	R3
BASANTI	7.16	6.95	6.52
China Mung	8.22	7.81	8.02
COGG 912	6.83	7.13	6.82
DMS 8	7.67	7.76	8.12
GANGA 1	7.13	6.72	6.9
HUM 2	7.91	7.76	7.86
IC 28083	6.98	6.91	6.61
IC 436637	8.04	8.33	8.59
IC 436763	8.05	8.3	8.89
IC 546476	6.73	6.59	6.61
IC 546488	6.52	6.69	6.45
IPM 02-14	6.84	7.14	7.11
IPM 02-15	6.86	7.03	6.79
IPM 02-30	8.37	8.65	8.57
IPM 409-4	6.99	7.04	6.83
IPM 410-3	7.08	7.18	7.12
KM 16-58	7.32	7.19	7.28
KM 16-69	7.17	7.15	6.89
KM 16-76	6.65	6.42	6.43
KM 16-81	7.38	7.64	7.6
KM 16-82	7.61	7.28	7.84
KM 2241	6.59	6.68	6.21
KM 7-134	7.65	7.62	7.89
LGG 460	6.48	6.53	6.61818
M 1032	6.4	6.76	6.9
M 1053	7.97692	8.29	7.78462
M 1131	7.7	7.32	7.28
M 1156	7.69	7.17	7.12
M 1168	6.45	6.9	6.51
M 1255	8.63	8.36364	9.17273
M 1358	7.42	7.3	7.3
M 1370	6.89	6.29	6.7
M 1372	7.09	8.06	7.4
M 1378	7.55	8.1	7.2
M 1400	6.88	7.01	6.96364
M 1421	6.84167	6.63333	5.33846
M 1447	7.81	8.06	7.75
M 145	7.09167	6.62	7.21
M 1477	7.45455	7.15	7.29
M 1485	6.83636	6.27273	6.30909
M 204	7.7	7.71818	7.30909
M 313	6.78333	7.00769	6.2
M 422	7.08333	7.38182	7.275
M 684	6.89167	6.64167	6.82727
M 700	7.16923	7.99091	7.52727
M 703	7.49	7.6	7.83
M 837	6.72	6.96	6.64
M 958	6.79231	7.09167	7.25385
M 981	6.81667	6.86923	7.09091
MH 1442	7.48182	7.49167	7.23333
MH 215	7.31538	7.87692	8.33333
MH 318	7.20909	7.53636	6.71818
MH 565	7.38182	7.26364	7.5
MH 810	6.97273	7.34615	7.63636
MH 934	7.03	7.37	7.21
MH 96-1	7.8	7.91	8.025
ML 1299	7.19091	6.98333	7.24
ML 1451	6.63077	6.76923	6.28462
ML 1464	7.98182	7.40769	7.67692
ML 1628	7.16	6.41	7.19
ML 2037	7.12	7.4	7.55
ML 818	7.78	7.49	7.62
MUSKAN	7.07273	7.35833	6.70909
OLRM 4	7.14	7.43	6.81
PDM 139	6.46364	5.84545	6.10769
PLM 167	6.89	6.98	6.4
PLM 271	7.35	7.95	8.62
PS 16	7.16364	7.57273	7.44
PUSA 0971	6.53333	6.44167	6.99091
PUSA 1131	6.71	6.98182	6.21667
PUSA 1132	7.09167	7.29167	7.28333
PUSA 1332	6.59	6.94	7.08
PUSA 1333	6.8	6.96	6.55
PUSA 1341	6.33	6.15	6.1
PUSA 1342	7.12727	7.41	7.52
PUSA 1441	7.45455	7.87	7.34615
Pusa Baisakhi	8.44	8.02	8.89
RMG 1028	7.53	7.16	7.51
RMG 991	6.9	7.32	6.63333
RMGP 1	8.06	8.05	7.91
SATYA	6.73	6.29091	6.40909
SML 668	6.06	6.53	6.42
TM 9725	6.85	6.83	6.43

## Sheet: Pod dia
Genotype	R1	R2	R3
BASANTI	3.02	2.78	2.91
China Mung	4.22	4.55	3.76
COGG 912	3.28	3.97	3.93
DMS 8	3.3	4.28	4.26
GANGA 1	3.51	4.41	3.68
HUM 2	4	3.69	3.87
IC 28083	4.22	4.09	4.27
IC 436637	4.28	4.34	4.02
IC 436763	4.21	4.61	4.79
IC 546476	4.09	2.68	3.75
IC 546488	3.81	3.97	4.17
IPM 02-14	3.61	3.83	3.13
IPM 02-15	3.63	3.83	3.75
IPM 02-30	4.13	3.82	3.92
IPM 409-4	3.68	4.02	3.85
IPM 410-3	3.89	3.68	4.21
KM 16-58	3.37	3.83	3.37
KM 16-69	3.63	3.95	3.77
KM 16-76	3.91	3.73	3.81
KM 16-81	3.78	3.56	2.96
KM 16-82	4.24	4.33	4.1
KM 2241	3.87	4.34	3.05
KM 7-134	4.5	4.34	4.17
LGG 460	3.48	3.9	3.32
M 1032	4.1	4.21	3.57
M 1053	4.37	3.75	4.4
M 1131	3.47	3.23	4.04
M 1156	3.4	3.34	2.97
M 1168	3.06	4.38	3.38
M 1255	4.56	4.9	5.04
M 1358	3.61	3.55	3.95
M 1370	3.71	3.34	3.46
M 1372	3.83	3.57	4.01
M 1378	3.75	4.29	4
M 1400	4.27	4.39	3.71
M 1421	3.33	3.61	3.61
M 1447	4.22	3.78	3.93
M 145	4.22	3.56	4.55
M 1477	4.64	4.34	4.3
M 1485	2.85	3.78	3.61
M 204	4.42	4.12	4.29
M 313	3.51	3.75	3.43
M 422	3.55	3.85	3.45
M 684	4.07	3.58	4.27
M 700	3.91	4.05	3.85
M 703	4.59	4.56	4.44
M 837	3.55	3.57	2.9
M 958	4.11	3.85	4.07
M 981	3.91	2.71	3.82
MH 1442	3.59	4.38	4.22
MH 215	4.19	3.81	3.77
MH 318	4.15	3.1	4.27
MH 565	3.75	4.86	4.14
MH 810	3.61	3.75	3.74
MH 934	4.37	3.85	3.24
MH 96-1	5.21	4.51	4.76
ML 1299	3.62	3.92	3.51
ML 1451	3.25	3.55	3.31
ML 1464	4.11	3.05	3.46
ML 1628	2.99	3.79	3.81
ML 2037	4.89	2.3	4.12
ML 818	3.25	3.75	3.67
MUSKAN	4.18	3.93	3.97
OLRM 4	4.05	4.18	4.29
PDM 139	2.73	2.68	3.62
PLM 167	3.99	3.85	4.01
PLM 271	4.21	3.65	4.12
PS 16	3.94	3.61	2.83
PUSA 0971	3.65	3.51	3.43
PUSA 1131	4.1	3.55	3.81
PUSA 1132	4.43	3.99	4.05
PUSA 1332	4.17	3.15	4.21
PUSA 1333	4.1	3.89	4.25
PUSA 1341	4.03	4.06	3.93
PUSA 1342	3.15	3.79	3.47
PUSA 1441	4.37	5.08	4.66
Pusa Baisakhi	4.49	4.31	3.93
RMG 1028	4.72	4.44	4.14
RMG 991	4.35	3.93	2.87
RMGP 1	4.08	4.17	4.27
SATYA	4.75	3.76	4.6
SML 668	4.13	3.57	4.04
TM 9725	3.86	3.81	3.74

## Sheet: SPP
Genotype	R1	R2	R3
BASANTI	8.66667	9.5	9.16667
China Mung	7.66667	9.33333	10
COGG 912	9	8.5	9.66667
DMS 8	8.16667	8.16667	10
GANGA 1	8.5	8.83333	8.66667
HUM 2	9	9.83333	10.8333
IC 28083	8.16667	9.83333	9.5
IC 436637	10.6667	10.3333	9.16667
IC 436763	7.83333	9.83333	9.83333
IC 546476	9.33333	9.5	9.33333
IC 546488	7.5	7.16667	8.33333
IPM 02-14	8.83333	8.5	9.16667
IPM 02-15	9.5	9.16667	8.16667
IPM 02-30	10.8333	10.8333	11.3333
IPM 409-4	10.3333	9.66667	8.66667
IPM 410-3	9.83333	8.83333	9.33333
KM 16-58	8.5	9.5	7.5
KM 16-69	8.5	9.5	8.33333
KM 16-76	7.5	10.8333	8.16667
KM 16-81	9.33333	9.5	9.5
KM 16-82	9.5	10.3333	9.16667
KM 2241	10.1667	10.1667	10
KM 7-134	9.16667	10.5	11
LGG 460	8	9.5	8.83333
M 1032	9.5	9.5	9.33333
M 1053	10.8333	12.1667	8.83333
M 1131	9.83333	9.16667	8.16667
M 1156	10.3333	9.33333	9.83333
M 1168	8.66667	10.1667	10.1667
M 1255	10.25	11.75	11.1667
M 1358	9	9.83333	9
M 1370	8.5	9.33333	9
M 1372	9	8.33333	8.33333
M 1378	10	9.5	9.66667
M 1400	9.33333	10	9.5
M 1421	8.5	8.16667	7.33333
M 1447	8.83333	10	10
M 145	10.3333	8.66667	8.5
M 1477	9.66667	8.83333	10.3333
M 1485	8.33333	7.83333	9.66667
M 204	11	10.6667	9.66667
M 313	9	9.5	8
M 422	9	10.8333	9
M 684	9.66667	9.66667	9.5
M 700	8.33333	10.1667	10
M 703	9.83333	8.5	10.1667
M 837	8.5	8.5	9.5
M 958	9.83333	10.1667	10.3333
M 981	9.5	9.16667	10.5
MH 1442	9.83333	10.6667	10.3333
MH 215	9.33333	11	12.1667
MH 318	9.5	12	9
MH 565	9.33333	8.83333	9.5
MH 810	9.5	9.5	10.3333
MH 934	8.83333	9.33333	9.66667
MH 96-1	9.5	9.33333	9.33333
ML 1299	11.1667	9.33333	10.5
ML 1451	10	9.5	8.83333
ML 1464	10.1667	10.5	10.1667
ML 1628	9.5	8.66667	9.33333
ML 2037	8.66667	9	10.3333
ML 818	9.83333	9.16667	9.83333
MUSKAN	10.3333	9.5	8.33333
OLRM 4	8	9.83333	9
PDM 139	9.33333	8.66667	8.66667
PLM 167	9.66667	10.5	9.33333
PLM 271	7.5	7.5	9.33333
PS 16	8.83333	9.5	8.83333
PUSA 0971	7.66667	8.5	10.5
PUSA 1131	9.16667	10	8.16667
PUSA 1132	10.3333	9.5	9.66667
PUSA 1332	7	8.66667	9.16667
PUSA 1333	9.16667	9.16667	7.66667
PUSA 1341	9.5	8	8
PUSA 1342	9	10	9.66667
PUSA 1441	9.33333	9.83333	8.5
Pusa Baisakhi	8.16667	8.5	8
RMG 1028	10.3333	7.5	8.83333
RMG 991	8.16667	9.33333	9
RMGP 1	9	9.66667	9.33333
SATYA	7.66667	7.33333	7.83333
SML 668	8.5	8.5	7.66667
TM 9725	9.5	7.83333	7.33333

## Sheet: Seed length
Genotype	R1	R2	R3
BASANTI	4.55	3.69	3.56
China Mung	4.49	4.19	4.76
COGG 912	4.01	4.18	4.31
DMS 8	3.78	3.98	4.31
GANGA 1	4.77	3.77	3.65
HUM 2	4.68	4.62	4.84
IC 28083	4.41	3.88	3.84
IC 436637	4.45	4.22	4.19
IC 436763	4.96	4.31	5.07
IC 546476	4.03	3.72	3.79
IC 546488	4.15	4.01	3.97
IPM 02-14	4.86	4.6	5.56
IPM 02-15	3.73	3.84	3.96
IPM 02-30	4.59	4.7	4.47
IPM 409-4	3.84	4.32	3.77
IPM 410-3	4.74	3.95	3.83
KM 16-58	3.78	3.99	3.74
KM 16-69	4.89	3.43	4.69
KM 16-76	4.12	3.67	3.86
KM 16-81	4.43	4.55	4.24
KM 16-82	4.15	3.87	4.01
KM 2241	3.54	4.16	3.61
KM 7-134	3.81	3.75	4.59
LGG 460	3.66	3.75	3.86
M 1032	3.78	3.97	3.55
M 1053	4.58	4.56	4.46
M 1131	4.27	3.93	4.65
M 1156	4.14	4.23	4.6
M 1168	4.42	4	4.67
M 1255	5.12	4.68	4.89
M 1358	3.86	4	3.41
M 1370	3.69	2.76	3.27
M 1372	4.39	5.17	4.78
M 1378	4.29	3.9	4.09
M 1400	3.92	3.71	4.14
M 1421	3.72	4.12	3.62
M 1447	3.59	4.17	3.88
M 145	5.14	4.36	3.95
M 1477	4.5	4.93	5.04
M 1485	3.7	3.68	4.09
M 204	4.13	3.74	4.39
M 313	3.49	3.7	3.53
M 422	4.07	3.97	4.31
M 684	4.43	4.51	3.99
M 700	4.63	4.33	4.45
M 703	4.61	4.73	4.43
M 837	4.3	3.83	3.8
M 958	3.9	4.09	3.95
M 981	4.05	3.45	3.29
MH 1442	4.01	4	4.26
MH 215	3.75	4.1	3.9
MH 318	4.9	4.94	4.55
MH 565	4.65	4.23	4.34
MH 810	4.78	3.32	3.76
MH 934	4.01	4	3.87
MH 96-1	3.87	4.14	3.57
ML 1299	3.73	3.81	3.61
ML 1451	4.1	3.61	4.19
ML 1464	4.53	3.99	4.1
ML 1628	4.94	4.9	5.13
ML 2037	3.83	4.2	4.28
ML 818	4.63	4.36	3.67
MUSKAN	3.5	4.15	4.04
OLRM 4	4.09	4.28	4.41
PDM 139	4.23	4.07	4.39
PLM 167	4	3.7	3.21
PLM 271	4.4	5.06	4.65
PS 16	4.56	4.18	4.78
PUSA 0971	3.99	3.9	3.77
PUSA 1131	3.94	3.46	3.23
PUSA 1132	4.31	3.7	3.89
PUSA 1332	3.66	4.19	3.65
PUSA 1333	3.5	4.12	3.39
PUSA 1341	4.3	4.29	4.87
PUSA 1342	3.59	2.85	3.05
PUSA 1441	4.03	4.49	4.3
Pusa Baisakhi	4.95	5.05	5.39
RMG 1028	3.29	3.73	3.4
RMG 991	4.17	4.35	4.45
RMGP 1	4.12	4.53	4.1
SATYA	3.74	4.16	3.9
SML 668	4.09	4.34	4.46
TM 9725	4.7	4.01	4.37

## Sheet: Seed width
Genotype	R1	R2	R3
BASANTI	2.57	2.78	2.56
China Mung	2.97	2.99	3.11
COGG 912	2.89	2.99	2.93
DMS 8	3.06	2.84	3.01
GANGA 1	3.03	3.16	3.01
HUM 2	3.31	2.9	3.36
IC 28083	2.84	2.95	3.09
IC 436637	2.98	3.06	2.89
IC 436763	3.3	3.1	3.29
IC 546476	2.41	3.05	2.79
IC 546488	3.16	3.22	3.25
IPM 02-14	3.27	3.18	3.15
IPM 02-15	2.48	2.86	2.72
IPM 02-30	3.04	3.13	3.23
IPM 409-4	2.87	2.73	2.94
IPM 410-3	3.21	3.11	3.23
KM 16-58	2.84	2.59	2.76
KM 16-69	3.34	3.24	3.49
KM 16-76	2.35	2.77	2.85
KM 16-81	2.84	3.02	2.59
KM 16-82	2.87	2.86	2.94
KM 2241	2.87	2.84	2.83
KM 7-134	2.77	2.9	2.69
LGG 460	3.08	3.01	3.12
M 1032	3.05	3.08	3.13
M 1053	3.4	3.22	3.12
M 1131	3.39	3.06	3.02
M 1156	3.02	2.96	2.97
M 1168	2.97	3.16	3.15
M 1255	3.32	3.21	3.4
M 1358	3.09	2.97	3.16
M 1370	2.77	2.39	2.54
M 1372	3.39	3.21	3.07
M 1378	3.14	3.29	3.23
M 1400	2.79	2.95	3.25
M 1421	2.89	2.73	2.79
M 1447	2.5	2.83	2.96
M 145	3.15	3.35	3.35
M 1477	3.57	3.61	3.67
M 1485	2.91	2.7	2.93
M 204	2.91	2.87	3.01
M 313	2.95	2.95	3.05
M 422	3.22	2.8	2.65
M 684	3.32	3.21	3.13
M 700	3.03	3.3	3.31
M 703	3.65	3.49	3.51
M 837	2.69	2.6	2.84
M 958	2.83	3.07	2.95
M 981	2.53	2.66	2.59
MH 1442	2.79	2.7	2.66
MH 215	2.65	2.84	2.97
MH 318	3.19	3.04	3.22
MH 565	3.26	3.16	3.3
MH 810	3.3	3.37	3.64
MH 934	3	3.08	3.12
MH 96-1	2.7	2.94	2.93
ML 1299	2.85	2.76	2.9
ML 1451	2.81	2.89	2.99
ML 1464	2.39	2.74	2.65
ML 1628	3.5	3.46	3.42
ML 2037	3.3	3.27	3.45
ML 818	3.15	2.96	3.06
MUSKAN	2.88	2.98	3.08
OLRM 4	3.27	3.15	2.97
PDM 139	3.15	3.16	2.99
PLM 167	2.73	2.99	2.81
PLM 271	3.21	3.68	3.63
PS 16	2.55	2.97	3.06
PUSA 0971	2.65	2.32	1.93
PUSA 1131	2.68	2.71	2.52
PUSA 1132	3.15	3.29	2.99
PUSA 1332	2.78	2.8	2.9
PUSA 1333	3.59	3.34	3.9
PUSA 1341	3.69	3.6	3.84
PUSA 1342	2.94	2.81	3.11
PUSA 1441	2.98	3.07	2.97
Pusa Baisakhi	3.38	3.41	3.28
RMG 1028	2.73	2.73	2.3
RMG 991	3.33	3.34	3.11
RMGP 1	3.39	3.34	3.15
SATYA	3.01	2.87	3.09
SML 668	2.9	3.07	3
TM 9725	3.14	2.92	3.18

## Sheet: HSW
Genotype	R1	R2	R3
BASANTI	3.29	3.61	3.69
China Mung	2.87	3.06	3.03
COGG 912	2.85	2.75	2.8
DMS 8	3.53	3.12	3.15
GANGA 1	3.16	3	3.14
HUM 2	3.22	3.49	3.68
IC 28083	2.82	2.76	2.28
IC 436637	3.91	3.81	3.45
IC 436763	3.57	3.07	3.21
IC 546476	2.99	3.31	2.75
IC 546488	2.01	2.02	2.16
IPM 02-14	3.26	3.14	3.38
IPM 02-15	2.4	2.05	2.87
IPM 02-30	3.42	2.97	2.49
IPM 409-4	2.65	2.63	2.37
IPM 410-3	2.24	2.46	2.16
KM 16-58	2.2	2.45	2.35
KM 16-69	3.05	2.9	2.83
KM 16-76	2.01	2.07	2.02
KM 16-81	3.01	2.64	2.07
KM 16-82	2.09	2.34	2.13
KM 2241	2.54	2.24	2.32
KM 7-134	2.93	3.12	2.99
LGG 460	2.62	2.51	2.21
M 1032	2.5	2.21	2.34
M 1053	2.97	3.23	3.03
M 1131	2.94	2.55	2.7
M 1156	2.98	3.01	3.45
M 1168	2.12	2.45	2.51
M 1255	3.22	3.45	3.57
M 1358	3.03	3.04	2.51
M 1370	2.53	2.41	2.81
M 1372	3.23	2.89	3.14
M 1378	3.11	2.89	2.79
M 1400	2.54	2.44	3.15
M 1421	2.75	2.25	2.55
M 1447	3.19	3.45	3.87
M 145	2.75	2.99	3.25
M 1477	3.45	2.93	2.99
M 1485	2.23	2.92	2.08
M 204	3.75	3.11	2.54
M 313	2.99	2.34	2.49
M 422	2.45	2.16	2.31
M 684	2.1	2.37	2.13
M 700	2.77	2.65	3.55
M 703	2.31	2.49	2.25
M 837	2.1	2.01	2.25
M 958	3.55	3.21	2.44
M 981	2.15	2.1	2.02
MH 1442	2.75	2.54	2.61
MH 215	2.99	3.14	3.06
MH 318	2.76	3	2.95
MH 565	3.12	3.01	2.7
MH 810	3.12	3.29	3.05
MH 934	3.01	2.64	2.93
MH 96-1	2.99	2.97	3.3
ML 1299	2.58	3.15	2.74
ML 1451	3.75	3.49	3.55
ML 1464	3.45	3.87	3.78
ML 1628	3.75	3.74	3.31
ML 2037	2.75	3.21	2.8
ML 818	2.58	3.19	2.64
MUSKAN	2.75	2.89	2.61
OLRM 4	3.25	3.58	3.35
PDM 139	4.58	4.43	4.76
PLM 167	2.34	2.61	2.3
PLM 271	3.39	3.87	3.75
PS 16	3.02	3.09	3.06
PUSA 0971	2.41	2.65	2.47
PUSA 1131	2.12	2.58	2.69
PUSA 1132	3.12	3.68	3.23
PUSA 1332	2.67	2.39	2.34
PUSA 1333	3.23	2.97	3.01
PUSA 1341	2.3	2.21	2.15
PUSA 1342	3.75	3.26	3.79
PUSA 1441	3.75	3.62	4.05
Pusa Baisakhi	4.03	4.09	3.97
RMG 1028	3	3.57	3.2
RMG 991	2.9	2.77	3.53
RMGP 1	2.94	3.25	3.18
SATYA	3.08	3.13	3.04
SML 668	2.5	2.93	3.4
TM 9725	2.11	2.01	2.13

## Sheet: FSG
Genotype	R1	R2	R3
M 1255	56	63	72
M 145	59	52	30
M 422	61	72	67
M 1421	62	64	84
KM 16-76	45	61	52
KM 16-82	34	45	56
M 204	34	44	47
PUSA 1332	47	55	52
ML 818	56	63	36
M 981	48	57	53
M 1378	76	63	73
KM 2241	70	53	80
SATYA	99	77	72
M 1358	59	86	92
PUSA 1131	100	94	100
DMS 8	90	80	85
KM 7-134	85	67	72
PUSA 0971	54	86	77
PLM 167	90	72	80
