# Supplementary material for: Genetic variation for tolerance to pre-harvest sprouting in mungbean (Vigna radiata) genotypes
Source: PeerJ. 2024 Jul 23;12:e17609. doi: 10.7717/peerj.17609 (PMC11276771; doi:10.7717/peerj.17609)
Supplement: Supplemental Information 3 [file peerj-12-17609-s003.docx]

**Supplementary table 1** List of 83 mungbean genotypes along with their source.

| **Type** | **Genotypes** | **Source** |
| --- | --- | --- |
| **Released variety (23)** | BASANTI | Chaudhary Charan Singh Agricultural University (CCSAU), Hisar, India |
| MH 215 |
| MH 318 |
| MH 810 |
| MH 96-1 |
| Muskan |
| Satya |
| China Mung | Introduction from China |
| COGG 912 | Tamil Nadu Agricultural University (TNAU), Coimbatore, India |
| GANGA 1 | Agricultural Research Station, Sri Ganga Nagar, Rajasthan, India |
| HUM 2 | Banaras Hindu University (BHU), Varanasi, India |
| IPM 02-14 | Indian Institute of Pulses Research (IIPR), Kanpur, India |
| IPM 410-3 | Indian Institute of Pulses Research (IIPR), Kanpur, India |
| PDM 139 |
| LGG 460 | Andhra Pradesh Agricultural University (APAU), Lam, India |
| ML 818 | Punjab Agricultural University, Ludhiana, India |
| PS 16 | Indian Agricultural Research Institute (IARI), New Delhi, India |
| PUSA 0971 |
| Pusa Baisakhi |
| RMG 1028 | Rajasthan Agricultural Research Institute (RARI), Durgapura, India |
| RMG 991 |
| RMGP 1 |
| SML 668 | CSK Himachal Pradesh KrishiVishvavidyalaya, Palampur, India |
| **Advanced breeding lines (23)** | DMS 8 | Tirhut college of Agriculture, Dholi, Bihar, India |
| IPM 02-15 | Indian Institute of Pulses Research (IIPR), Kanpur, India |
| IPM 02-30 |
| IPM 409-4 |
| KM 16-58 | All India Coordinated Research Project (AICRP), MULLaRP, Kanpur, India |
| KM 16-69 |
| KM 16-76 |
| KM 16-81 |
| KM 16-82 |
| KM 2241 |
| KM 7-134 |
| MH 1442 | Chaudhary Charan Singh Agricultural University (CCSAU), Hisar, India |
| MH 565 |
| MH 934 |
| ML 1628 | Punjab Agricultural University, Ludhiana, India |
| PUSA 1131 | Indian Agricultural Research Institute (IARI), New Delhi, India |
| PUSA 1132 |
| PUSA 1332 |
| PUSA 1333 |
| PUSA 1341 |
| PUSA 1342 |
| PUSA 1441 |
| TM 9725 | Bhabha Atomic Research Centre (BARC), Mumbai, India |
| **Germplasm lines (37)** | IC 28083 | National Bureau of Plant Genetic Resources, New Delhi, India |
| IC 436637 |
| IC 436763 |
| IC 546476 |
| IC 546488 |
| M 1032 | Asian Vegetable Research and Development Centre (AVRDC), Taiwan |
| M 1053 |
| M 1131 |
| M 1156 |
| M 1168 |
| M 1255 |
| M 1358 |
| M 1370 |
| M 1372 |
| M 1378 |
| M 1400 |
| M 1421 |
| M 1447 | Indian Institute of Pulses Research (IIPR), Kanpur, India |
| M 1477 | Selection from Uttar Pradesh, India |
| M 1485 | Selection from Maharastra, India |
| M 204 | Selection from Bihar, India |
| M 145 | Indian Agricultural Research Institute (IARI), New Delhi, India |
| M 313 |
| M 422 |
| M 700 |
| M 684 | Selection from Hissar, India |
| M 703 | Asian Vegetable Research and Development Centre (AVRDC), Taiwan |
| M 837 |
| M 958 |
| M 981 |
| PLM 167 |
| PLM 271 |
| ML 1299 | Punjab Agricultural University, Ludhiana, India |
| ML 1451 |
| ML 1464 |
| ML 2037 |
| OLRM 4 | Orissa land race mungbean, Orissa, India |
